# Supplementary material
Source: publisher figshare collection journal article supplement (https://acs.figshare.com/ndownloader/files/21399441)
Supplement: Supplementary file 1 [file 21399441]

## Supporting Information

### Fabrication of Oleogels via a Facile Method by Oil Absorption in the Aerogel Templates of Protein-Polysaccharide Conjugates

Kailun Chen<sup>a</sup>, Hui Zhang<sup>a, b, c \*</sup>

<sup>a</sup> College of Biosystems Engineering and Food Science, Zhejiang University, Hangzhou 310058, China

<sup>b</sup> Ningbo Research Institute, Zhejiang University, Ningbo 315100, China

<sup>c</sup> Zhejiang Key Laboratory for Agro-Food Processing, Zhejiang University, Hangzhou 310058, China

\* Corresponding author. E-mail: hubert0513@zju.edu.cn. Telephone: +86-571-88982981; fax: +86-571-88982981.

**Keywords:** O-phthaldialdehyde (OPA) method; browning index.

## **S1. Methods:**

### *S1.1. O-phthaldialdehyde (OPA) method*

The degree of graft was determined according to the O-phthaldialdehyde (OPA) method described previously with slight modifications.<sup>1</sup> The OPA reagent was prepared freshly before use by mixing the following reagents: 40 mg of OPA dissolved in a mixture of 1 mL of methanol, 25 mL of 0.1 M sodium borate buffer (pH 9.85), 100  $\mu$ L  $\beta$ -mercaptoethanol, and 2.5 mL of 20% (w/v) sodium dodecyl sulfate in deionized water. The mixture was diluted with water to reach a total volume of 50 mL. Briefly, 4 mL of OPA reagent and 200  $\mu$ L of sample solution were mixed in the tube and then reacted at 35 °C in a water bath for 2 min. The absorbance of the reacted solution was measured immediately at 340 nm using a Tecan Infinite M200 Pro instrument (Mannedorf, Switzerland). A calibration curve was obtained by using 0.5 - 3 mM lysine as standard. The degree of graft was calculated based on the changes in the content of free amino groups using the following equation:

$$DG (\%) = \frac{C_1 - C_t}{C_1} \times 100 \quad (1)$$

where  $C_1$  and  $C_t$  are the content of free amino groups of the mixture before and after incubation, respectively.

### *S1.2. The browning index*

The conjugates were diluted to the concentration of 5 mg/mL with distilled water in order to obtain an optical density of less than 1.5. Then the browning index was measured at 420 nm using a Tecan Infinite M200 Pro instrument (Mannedorf,

Switzerland) based on the reported method with modifications.<sup>2</sup> All the experiments were carried out in triplicate.

## References

1. Vigo, M. S.; Malec, L. S.; Gomez, R. G.; Llosa, R. A., Spectrophotometric assay using o-phthaldialdehyde for determination of reactive lysine in dairy products. *Food Chem* **1992**, *44* (5), 363-365.
2. Lertittikul, W.; Benjakul, S.; Tanaka, M., Characteristics and antioxidative activity of Maillard reaction products from a porcine plasma protein–glucose model system as influenced by pH. *Food Chem* **2007**, *100* (2), 669-677.
